# Supplementary material for: Molecular Design of HER3-Targeting Affibody Molecules: Influence of Chelator and Presence of HEHEHE-Tag on Biodistribution of 68Ga-Labeled Tracers
Source: PubMed Central journal article supplement (PMC6429182; doi:10.3390/ijms20051080), 2019-03-02
Supplement: ijms-20-01080-s001.pdf [file ijms-20-01080-s001.pdf]

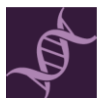

Supplementary Data

# Molecular design of HER3-targeting affibody molecules: Influence of chelator and presence of HEHEHE-tag on biodistribution of <sup>68</sup>Ga-labeled tracers

Charles Dahlsson Leitao<sup>1†</sup>, Sara S. Rinne<sup>2†</sup>, Bogdan Mitran<sup>2</sup>, Anzhelika Vorobyeva<sup>3</sup>, Ken Andersson<sup>1</sup>, Vladimir Tolmachev<sup>3</sup>, Stefan Ståhl<sup>1</sup>, John Löfblom<sup>1</sup>, Anna Orlova<sup>2,4\*</sup>

<sup>1</sup>Department of Protein Science, School of Engineering Sciences in Chemistry, Biotechnology and Health, KTH Royal Institute of Technology, Stockholm, Sweden

<sup>2</sup>Department of Medicinal Chemistry, Uppsala University, Uppsala, Sweden

<sup>3</sup>Department of Immunology, Genetics and Pathology, Uppsala University, Uppsala, Sweden

<sup>4</sup>Science for Life Laboratory, Uppsala University, Sweden

<sup>†</sup>Equal Contribution

\* Email: anna.orlova@ilk.uu.se, Telephone: +4618-471 5303, cell telephone: +46739922846;  
Address: Dag Hammarskjöldsv 14C, 3tr, 751 83 Uppsala, Sweden

## Supplementary Data

## Results

HER3-binding affibody molecules Z<sub>08698</sub> and (HE)<sub>3</sub>-Z<sub>08698</sub> were recombinantly produced in *E. coli* and coupled to maleimide derivatives of NOTA and NODAGA and subjected to reverse-phase high performance liquid chromatography (RP-HPLC) as a final step for remnant chelator removal and separation from unconjugated protein.

The purity, determined with RP-HPLC, exceeded 95% for all conjugates (Figure S1). Molecular mass was determined with ESI-MS (Table S1), observing no discrepancy between experimental and theoretical masses (Figure S2). The mass determination revealed non-processed N-terminal methionine for (HE)<sub>3</sub>-Z<sub>08698</sub>-NOTA and (HE)<sub>3</sub>-Z<sub>08698</sub>-NODAGA, owing to the presence of the (HE)<sub>3</sub>-tag at the N-terminus. Z<sub>08698</sub>-NOTA and Z<sub>08698</sub>-NODAGA exhibited additional peaks, which is likely the result of chelated metal contaminants. Thermal denaturation curves are shown in Figure S3 and the associated melting temperatures are presented in Table S1. Kinetic data from SPR analysis and associated K<sub>D</sub> values are shown in Figure S4 and Table S1.

**Table S1 Experimental molecular masses, affinities and melting temperatures** of the conjugates. The theoretical molecular mass is in parenthesis. \* Data published earlier [13, 24]

|                                              | Mw (Da)         | K <sub>D</sub> (pM, mean ± SD) | T <sub>m</sub> (°C) |
|----------------------------------------------|-----------------|--------------------------------|---------------------|
| (HE) <sub>3</sub> -Z <sub>08698</sub> -NOTA* | 8149.7 (8149.1) | 55 ± 7.1                       | 65.2                |
| Z <sub>08698</sub> -NOTA*                    | 7219.6 (7219.1) | 40 ± 1.5                       | 63.8                |
| (HE) <sub>3</sub> -Z <sub>HER3</sub> -NODAGA | 8221.2 (8221.1) | 38 ± 10                        | 65.0                |
| Z <sub>HER3</sub> -NODAGA*                   | 7291.5 (7291.2) | 11 ± 0.6                       | 64.3                |

34 Complete refolding was observed for each conjugate following thermal denaturation by  
35 comparison of spectra obtained at 20°C before and after denaturation (Figure S3). Kinetic data  
36 acquired from SPR analysis are presented in Table S1 as the average from duplicate injections.  
37 Representative sensorgrams with fitted curves for each conjugate are shown in Figure S4.  
38

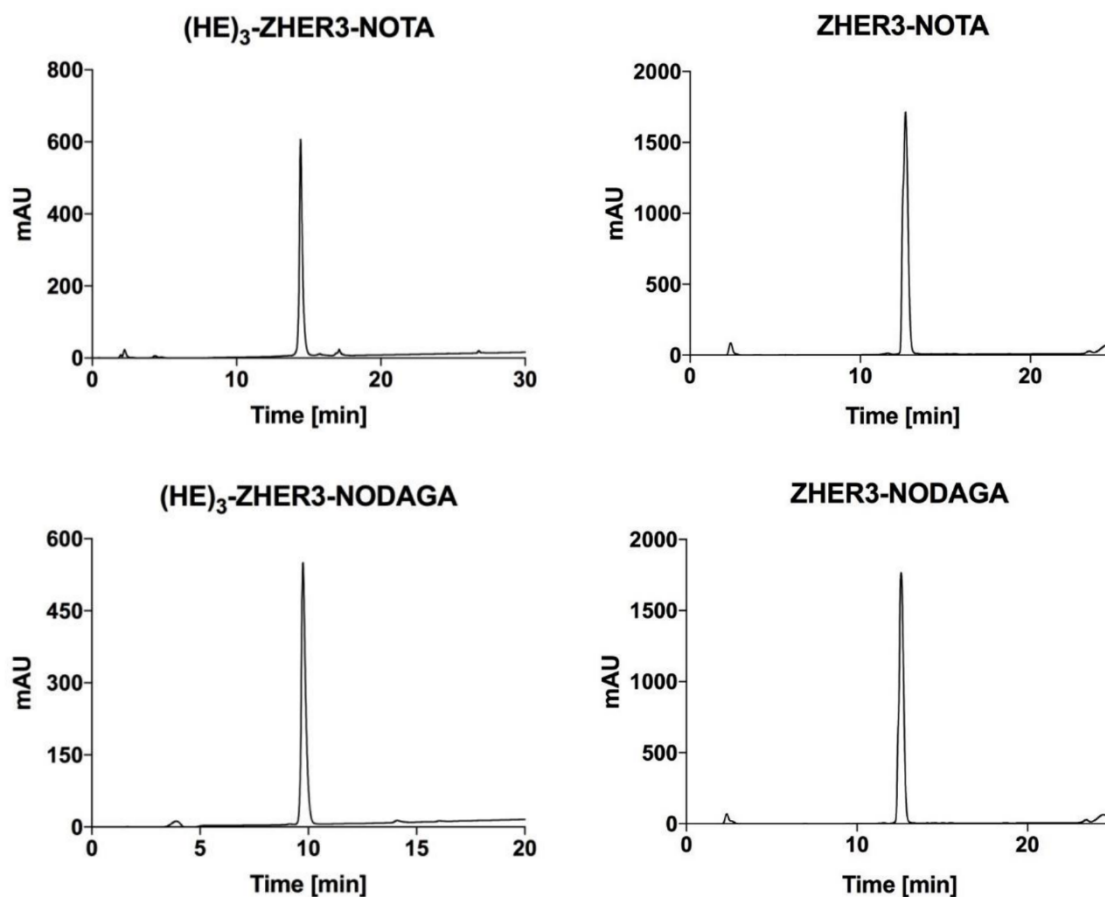

39

40 **Figure S1 Evaluation of purity.** Absorbance measurements at 220 nm from RP-HPLC was used to  
41 evaluate the purity of the four conjugates. Purity of (HE)<sub>3</sub>-Z<sub>08698</sub>-NOTA, Z<sub>08698</sub>-NOTA and  
42 Z<sub>08698</sub>-NODAGA was previously described [13,24].

43

44

45

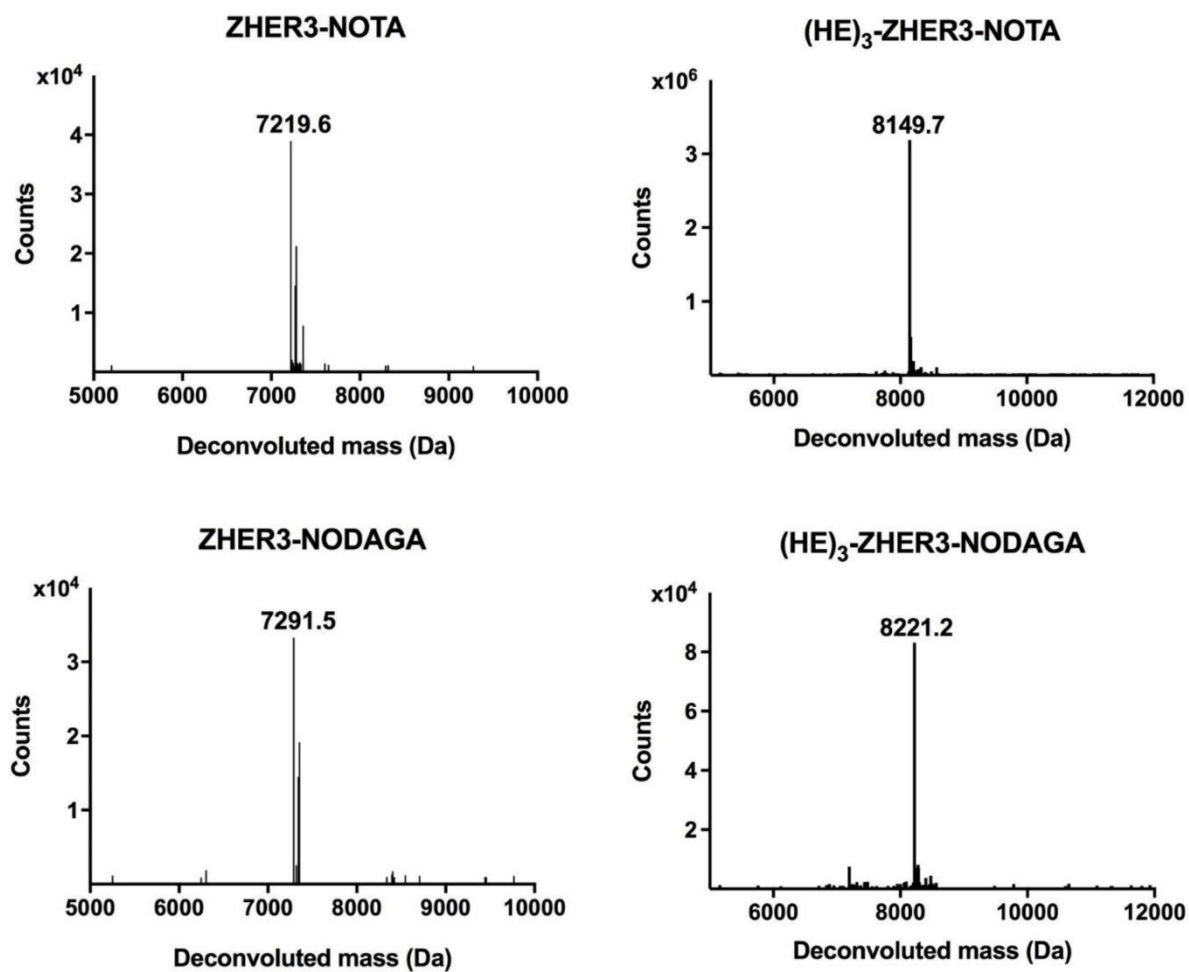

46

47

48

49

**Figure S2: Determination of molecular mass.** Observed peaks from ESI-MS were in agreement with the theoretical masses shown in Table S1. Molecular masses of  $(\text{HE})_3\text{-Z}_{08698}\text{-NOTA}$ ,  $\text{Z}_{08698}\text{-NOTA}$  and  $\text{Z}_{08698}\text{-NODAGA}$  were previously reported [13,24].

50

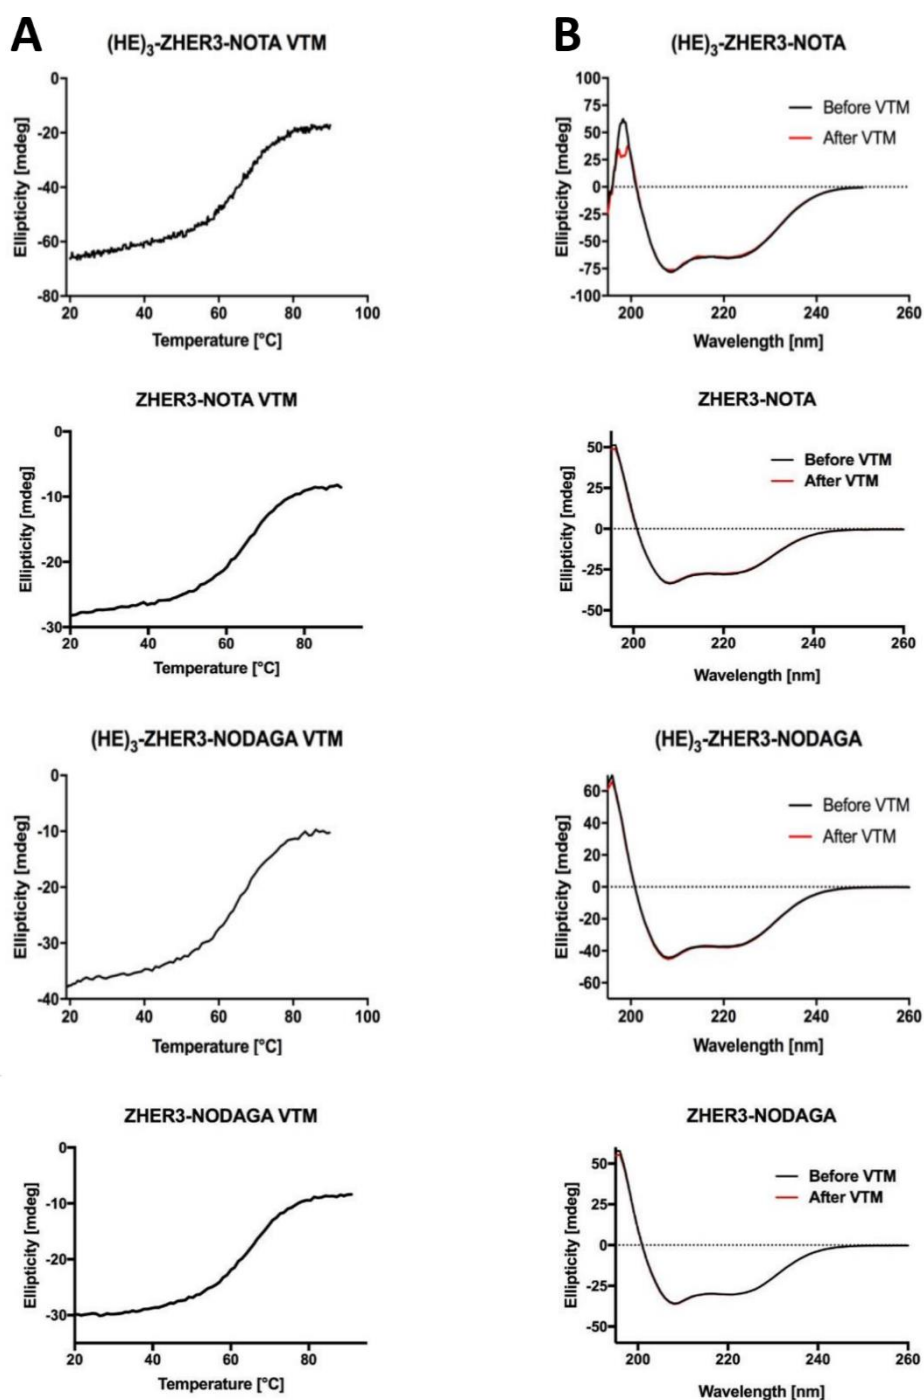

51

52

53 **Figure S3 Analysis of thermal stability and refolding capacity.** A) Thermal stability was evaluated,

54 using variable temperature measurement (VTM), by observing the change in ellipticity at 221 nm

55 while incrementally heating the sample from 20°C to 90°C. B) Superimposed circular dichroism

56 spectra, measured at 20°C and in the range 195-260 nm, before and after thermal denaturation,

57 demonstrating complete refolding capacity. Melting temperatures ( $T_m$ ) were determined by fitting58 the curves using a Boltzmann Sigmoidal model. The determined  $T_m$  values for each conjugate are59 presented in Table S1. Thermal stability and refolding of (HE)<sub>3</sub>-Z<sub>08698</sub>-NOTA, Z<sub>08698</sub>-NOTA andZ<sub>08698</sub>-NODAGA were previously described [13,24].

60

61

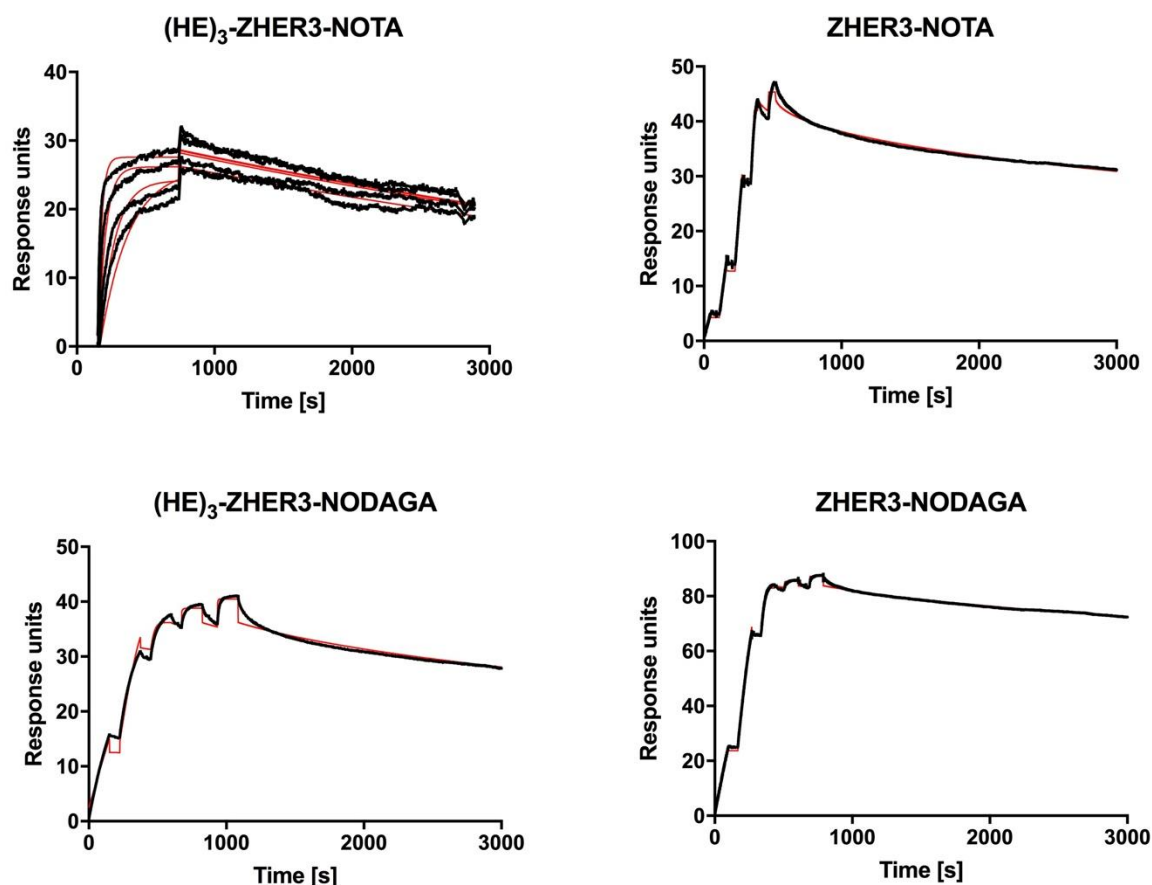

62

63 **Figure S4: Representative experimental sensorgrams (black) with fitted curves (red) from SPR**  
 64 **analysis.** Immobilized human HER3 was subjected to five concentrations (3.125, 6.25, 12.5, 25 and 50  
 65 nM) of NODAGA-conjugated affibody in a single cycle. For NOTA-conjugated affibody, four  
 66 concentrations (1.875, 3.75, 7.5 and 15 nM) were injected in a multi-cycle setup. Monovalent affinities,  
 67 based on a Langmuir 1:1 model, are presented in Table S1. SPR analysis of (HE)<sub>3</sub>-Z<sub>08698</sub>-NOTA,  
 68 Z<sub>08698</sub>-NOTA and Z<sub>08698</sub>-NODAGA was previously reported [13,24].

69

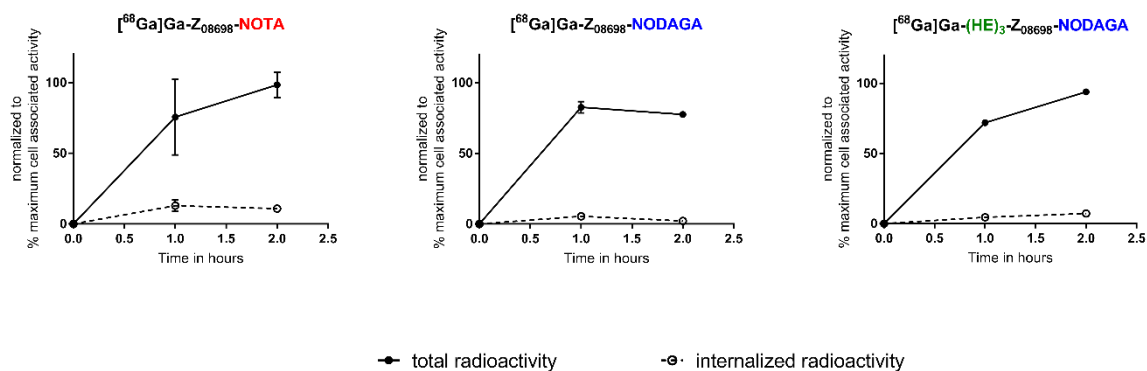

70

71 **Figure S5: Cellular processing of [68Ga]Ga-Z<sub>08698</sub>-NOTA, [68Ga]Ga-Z<sub>08698</sub>-NODAGA,**  
 72 **[68Ga]Ga-(HE)<sub>3</sub>-Z<sub>08698</sub>-NODAGA on DU145 cells.** Cells were continuously incubated with 0.1 nM of  
 73 labeled construct at 37°C. Error bars may not be visible because they are smaller than the curve  
 74 symbols.
